# Supplementary material
Source: PubMed Central journal article supplement (PMC5084892)
Supplement: ASN.2015091065SupplementaryData.pdf [file ASN.2015091065SupplementaryData.pdf]

Supplementary Table 1- Association between CUA risk and use of cinacalcet or nutritional vitamin D across the severity categories for each mineral metabolism marker in a case-control study (n=1,030 CUA cases and 2,060 controls)

| Stratification of mineral metabolism markers according to tertiles |                          | Risk for future CUA development in cinacalcet users vs. cinacalcet non-users (OR, 95% CI) | Risk for future CUA development in nutritional vitamin D users vs. nutritional vitamin D non-users (OR, 95% CI) |
|--------------------------------------------------------------------|--------------------------|-------------------------------------------------------------------------------------------|-----------------------------------------------------------------------------------------------------------------|
| Serum calcium tertiles                                             | Lowest (<8.4 mg/dL)      | 3.54 (1.68-7.42)                                                                          | 1.59 (0.97-2.61)                                                                                                |
|                                                                    | Middle (8.4-10.1 mg/dL)  | 4.97 (2.33-10.60)                                                                         | 2.04 (1.20-3.45)                                                                                                |
|                                                                    | Highest (>10.1 mg/dL)    | 2.13 (1.16-3.92)                                                                          | 2.10 (1.21-3.63)                                                                                                |
| Serum phosphorous tertiles                                         | Lowest (<3.9 mg/dL)      | 1.71 (0.51-5.80)                                                                          | 1.62 (0.94-2.80)                                                                                                |
|                                                                    | Middle (3.9-5.5 mg/dL)   | 2.26 (0.98-5.21)                                                                          | 2.42 (1.45-4.02)                                                                                                |
|                                                                    | Highest (>5.5 mg/dL)     | 2.03 (1.20-3.44)                                                                          | 1.60 (0.96-2.66)                                                                                                |
| Serum parathyroid hormone tertiles                                 | Lowest (<171 pg/mL)      | 5.26 (2.03-13.61)                                                                         | 3.05 (1.67-5.58)                                                                                                |
|                                                                    | Middle (171-428 pg/mL)   | 2.01 (0.87-6.24)                                                                          | 1.24 (0.74-2.06)                                                                                                |
|                                                                    | Highest (>428 pg/mL)     | 2.45 (0.72-8.71)                                                                          | 1.80 (1.01-2.94)                                                                                                |
| Serum 25-hydroxyvitamin D tertiles                                 | Lowest (<11.6 ng/mL)     | **                                                                                        | **                                                                                                              |
|                                                                    | Middle (11.6-18.0 ng/mL) | 11.84 (1.29-58.74)                                                                        | 1.96 (0.61-6.27)                                                                                                |
|                                                                    | Highest (>18.0 ng/mL)    | 6.21 (0.69-56.11)                                                                         | 1.34 (0.40-4.48)                                                                                                |

\*\*Analyses could not be done due to small sample size.

Supplementary Table 2- Association between CUA risk and use of cinacalcet or nutritional vitamin D across the severity categories for each mineral metabolism marker in the FMCNA cohort (n=262,302)

| Stratification of mineral metabolism markers according to tertiles |                          | Risk for future CUA development in cinacalcet users vs. cinacalcet non-users (OR, 95% CI) | Risk for future CUA development in nutritional vitamin D users vs. nutritional vitamin D non-users (OR, 95% CI) |
|--------------------------------------------------------------------|--------------------------|-------------------------------------------------------------------------------------------|-----------------------------------------------------------------------------------------------------------------|
| Serum calcium tertiles                                             | Lowest (<8.1 mg/dL)      | 3.38 (2.17-6.17)                                                                          | 1.93 (1.17-3.17)                                                                                                |
|                                                                    | Middle (8.1-9.6 mg/dL)   | 3.93 (2.83-4.11)                                                                          | 2.49 (1.72-3.62)                                                                                                |
|                                                                    | Highest (>9.6 mg/dL)     | 3.63 (2.12-4.31)                                                                          | 1.26 (1.01-1.72)                                                                                                |
| Serum phosphorous tertiles                                         | Lowest (<4.3 mg/dL)      | 3.05 (2.01-4.12)                                                                          | 1.70 (0.78-3.73)                                                                                                |
|                                                                    | Middle (4.3-5.1 mg/dL)   | 3.84 (3.05-4.13)                                                                          | 2.85 (1.84-4.41)                                                                                                |
|                                                                    | Highest (>5.1 mg/dL)     | 2.99 (2.43-3.98)                                                                          | 1.57 (1.12-2.22)                                                                                                |
| Serum parathyroid hormone tertiles                                 | Lowest (<91 pg/mL)       | 2.21 (1.71-2.83)                                                                          | 1.66 (1.12-3.53)                                                                                                |
|                                                                    | Middle (91-319 pg/mL)    | 2.79 (1.26-3.67)                                                                          | 2.66 (1.67-4.26)                                                                                                |
|                                                                    | Highest (>319 pg/mL)     | 3.12 (1.52-4.31)                                                                          | 1.69 (1.15-2.51)                                                                                                |
| Serum 25-hydroxyvitamin D tertiles                                 | Lowest (<14.7 ng/mL)     | 3.31 (1.85-8.86)                                                                          | 1.26 (1.10-3.37)                                                                                                |
|                                                                    | Middle (14.7-29.7 ng/mL) | 3.52 (2.44-6.77)                                                                          | 1.46 (1.12-3.57)                                                                                                |
|                                                                    | Highest (>29.7 ng/mL)    | 2.93 (1.43-8.21)                                                                          | 1.48 (1.02-3.70)                                                                                                |

Supplementary Table 3- Conditional logistic regression analyses showing association between baseline characteristics at hemodialysis initiation and subsequent CUA development

|                                                             | <b>Skin biopsy-confirmed CUA<br/>(n=567 cases and 1,134 controls)</b> |                                        | <b>Clinically diagnosed CUA<br/>(n=463 cases and 926 controls)</b> |                                        |
|-------------------------------------------------------------|-----------------------------------------------------------------------|----------------------------------------|--------------------------------------------------------------------|----------------------------------------|
|                                                             | <b>Univariate<br/>(OR, 95% CI)</b>                                    | <b>Multi-variable<br/>(OR, 95% CI)</b> | <b>Univariate<br/>(OR, 95% CI)</b>                                 | <b>Multi-variable<br/>(OR, 95% CI)</b> |
| <b>Diabetes mellitus</b>                                    | 1.95 (1.61-2.29)                                                      | 1.98 (1.71-2.65)                       | 1.89 (1.56-3.20)                                                   | 1.74 (1.35-2.89)                       |
| <b>Body mass index,<br/>per 5 kg/m<sup>2</sup> increase</b> | 1.41 (1.21-1.54)                                                      | 1.37 (1.31-1.47)                       | 1.38 (1.29-1.52)                                                   | 1.32 (1.24-1.48)                       |
| <b>Systolic blood pressure,<br/>per 10 mmHg increase</b>    | 1.03 (1.01-1.06)                                                      | 1.01 (0.96-1.06)                       | 1.02 (0.99-1.10)                                                   | 1.01 (0.95-1.09)                       |
| <b>Diastolic blood pressure,<br/>per 10 mmHg increase</b>   | 1.01 (0.94-1.08)                                                      | 1.08 (0.89-1.21)                       | 0.98 (0.91-1.12)                                                   | 1.10 (0.74-1.24)                       |
| <b>Serum calcium,<br/>per 1 mg/dL increase</b>              | 1.13 (1.01-1.21)                                                      | 1.38 (1.21-1.61)                       | 1.09 (0.99-1.35)                                                   | 1.19 (1.10-1.35)                       |
| <b>Serum phosphorus,<br/>per 1 mg/dL increase</b>           | 1.06 (1.04-1.10)                                                      | 1.11 (1.02-1.15)                       | 1.05 (1.02-1.12)                                                   | 1.06 (1.01-1.16)                       |
| <b>Serum PTH,<br/>per 100 pg/mL increase</b>                | 1.10 (1.05-1.18)                                                      | 1.09 (1.06-1.19)                       | 1.12 (1.09-1.13)                                                   | 1.11 (1.04-1.26)                       |
| <b>Serum ALP,<br/>per 50 U/L increase</b>                   | 1.05 (1.03-1.08)                                                      | 1.02 (0.99-1.05)                       | 1.15 (1.10-1.19)                                                   | 1.03 (0.97-1.09)                       |
| <b>Dialysate calcium,<br/>per 1 mmol/L increase</b>         | 0.87 (0.68-1.24)                                                      | 0.98 (0.61-1.51)                       | 0.92 (0.54-1.12)                                                   | 0.94 (0.59-1.24)                       |
| <b>Nutritional vitamin D<br/>treatment</b>                  | 1.84 (1.32-2.41)                                                      | 2.21 (1.39-3.37)                       | 1.98 (1.26-3.25)                                                   | 2.01 (1.10-2.45)                       |
| <b>Activated vitamin D<br/>treatment</b>                    | 0.81 (0.67-0.97)                                                      | 0.95 (0.76-1.26)                       | 0.85 (0.69-1.01)                                                   | 0.92 (0.74-1.36)                       |
| <b>Cinacalcet treatment</b>                                 | 3.14 (2.17-3.82)                                                      | 2.14 (1.17-3.95)                       | 2.56 (1.99-3.69)                                                   | 1.86 (1.65-2.87)                       |
| <b>Phosphate binding agent<br/>treatment</b>                | 1.13 (1.10-1.34)                                                      | 1.21 (0.81-1.65)                       | 1.14 (1.05-1.37)                                                   | 1.32 (0.78-1.56)                       |
| <b>Serum albumin,<br/>per 1 g/dL increase</b>               | 1.05 (0.91-1.20)                                                      | 0.85 (0.74-1.14)                       | 1.11 (0.81-1.31)                                                   | 0.95 (0.69-1.22)                       |
| <b>Hemoglobin,<br/>per 1 g/dL increase</b>                  | 0.89 (0.78-0.95)                                                      | 0.91 (0.84-0.98)                       | 0.91 (0.64-1.12)                                                   | 0.85 (0.78-1.12)                       |
| <b>Serum bicarbonate,<br/>per 10 mEq/L increase</b>         | 0.99 (0.98-1.02)                                                      | 0.98 (0.92-1.03)                       | 0.98 (0.94-1.06)                                                   | 0.91 (0.74-1.02)                       |
| <b>spKt/V,<br/>per 1 unit increase</b>                      | 0.51 (0.46-0.78)                                                      | 0.82 (0.56-1.35)                       | 0.59 (0.41-0.87)                                                   | 0.91 (0.65-1.23)                       |
| <b>Warfarin treatment</b>                                   | 3.92 (2.97-5.59)                                                      | 3.21 (2.11-3.95)                       | 2.51 (1.99-4.21)                                                   | 3.56 (2.01-6.21)                       |
| <b>Statin treatment</b>                                     | 1.17 (1.01-1.42)                                                      | 0.98 (0.71-1.32)                       | 1.09 (0.99-1.58)                                                   | 0.89 (0.74-1.12)                       |
| <b>ESA treatment</b>                                        | 0.64 (0.55-0.75)                                                      | 0.76 (0.51-0.98)                       | 0.56 (0.45-0.88)                                                   | 0.81 (0.62-1.02)                       |
| <b>ACEi/ARB treatment</b>                                   | 1.14 (0.92-1.42)                                                      | 1.12 (0.89-1.49)                       | 1.09 (0.81-1.29)                                                   | 1.09 (0.78-1.26)                       |

Supplementary Table 4- Association between frequency of insulin injections and risk of CUA involving lower abdomen and/or upper thigh areas across the tertiles of body mass index (n=348 CUA cases and 906 controls)

| Exposure                                                                                            | Risk for future CUA involving lower abdomen and/or upper thigh areas (OR, 95% CI) according to tertiles of body mass index |                                   |                                  |
|-----------------------------------------------------------------------------------------------------|----------------------------------------------------------------------------------------------------------------------------|-----------------------------------|----------------------------------|
|                                                                                                     | Lowest (<27 kg/m <sup>2</sup> )                                                                                            | Middle (27-35 kg/m <sup>2</sup> ) | Highest (>35 kg/m <sup>2</sup> ) |
| 0 insulin injections/day                                                                            | Reference                                                                                                                  | Reference                         | Reference                        |
| 1 or 2 insulin injections/day                                                                       | 1.12 (1.04-3.40)                                                                                                           | 1.32 (1.12-3.75)                  | 1.65 (0.86-3.21)                 |
| 3 insulin injections/day                                                                            | 1.39 (0.85-6.71)                                                                                                           | 1.53 (1.01-4.96)                  | 1.95 (0.88-4.01)                 |
| >3 insulin injections/day                                                                           | 3.68 (1.25-7.81)                                                                                                           | 1.99 (1.20-4.47)                  | 2.81 (1.42-5.58)                 |
| P value (for trend in the ORs across categories of insulin injection frequency in each BMI tertile) | 0.02                                                                                                                       | 0.04                              | 0.03                             |
